# Supplementary material for: An unexpected twist to the activation of IKKβ: TAK1 primes IKKβ for activation by autophosphorylation
Source: PubMed Central journal article supplement (PMC4206954; doi:10.1042/bj20140444), 2014-07-10
Supplement: bj4610531add.pdf [file bj4610531add.pdf]

## SUPPLEMENTARY ONLINE DATA

# An unexpected twist to the activation of IKK $\beta$ : TAK1 primes IKK $\beta$ for activation by autophosphorylation

Jiazhen ZHANG\*, Kristopher CLARK\*, Toby LAWRENCE†, Mark PEGGIE\* and Philip COHEN\*<sup>1</sup>

\*MRC Protein Phosphorylation and Ubiquitylation Unit, College of Life Sciences, University of Dundee, Dundee DD1 5EH, Scotland, U.K.

†Centre d'Immunologie de Marseille-Luminy, Parc Scientifique &amp; Technologique de Luminy, Case 906, 13288 Marseille cedex 09, France

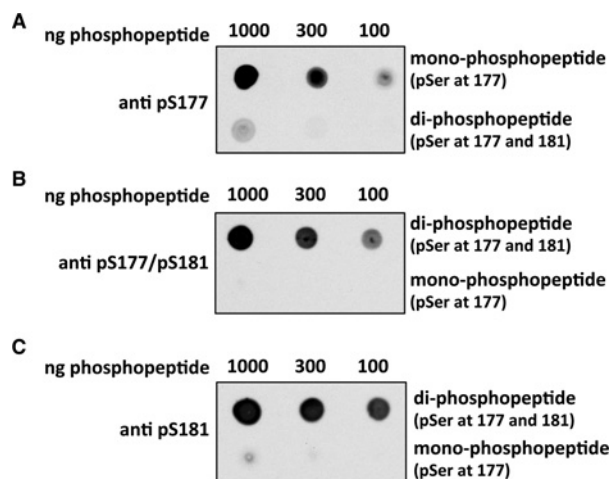

**Figure S1** Phosphorylation of Ser<sup>181</sup> interferes with the recognition of phospho-Ser<sup>177</sup> by the phospho-specific antibody that recognizes this site

(A) The indicated amounts of phosphopeptides corresponding to amino acid residues 171–187 of IKK $\beta$  phosphorylated at Ser<sup>177</sup> only or at both Ser<sup>177</sup> and Ser<sup>181</sup> were spotted on to nitrocellulose membranes and probed with the phospho-specific antibody recognizing phospho(p)-Ser<sup>177</sup>. (B) Same as (A), except that the peptides were immunoblotted with the antibody that only recognizes the di-phosphorylated form of IKK $\beta$  phosphorylated at both Ser<sup>177</sup> and Ser<sup>181</sup>. (C) Same as (A), except that the phosphopeptides were immunoblotted with the antibody that recognizes IKK $\beta$  phosphorylated at Ser<sup>181</sup>.

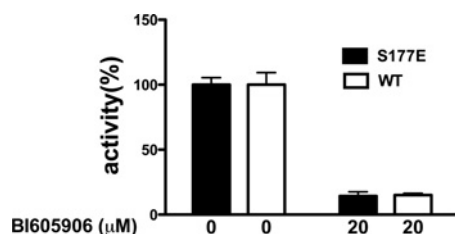

**Figure S2** Effect of BI605906 on the activity of wild-type and mutant IKK $\beta$

HA-tagged wild-type IKK $\beta$  (WT) or the IKK $\beta$ [S177E] mutant (S177E) were expressed in HEK-293 cells, immunoprecipitated from the cell extracts using an anti-HA antibody and assayed for activity in the absence or presence of BI605906. The activities are plotted as a percentage of that obtained in the absence of inhibitor. Results are means  $\pm$  S.E.M. of duplicate determinations. Similar results were obtained in another independent experiment.

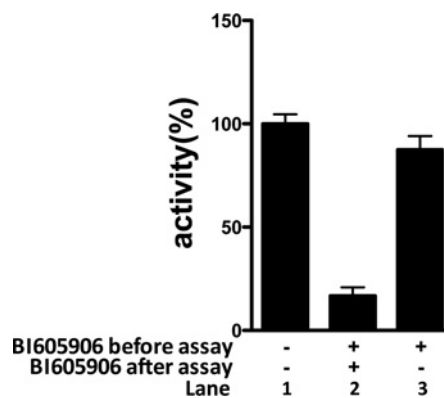

**Figure S3** BI605906 is a reversible inhibitor of IKK $\beta$

MEFs from IKK $\alpha$ -deficient mice were stimulated for 10 min with 5.0 ng/ml IL-1 and the cells were lysed. The endogenous IKK $\beta$  was immunoprecipitated from 0.2 mg of cell extract protein and incubated for 1 h at 30 °C without (–, lane 1) or with (+, lanes 2 and 3) 20  $\mu$ M BI605906. In lane 3 only, the immunoprecipitates were washed extensively to remove BI605906. All the immunoprecipitates were then assayed for IKK $\beta$  activity. The Figure shows that IKK $\beta$  activity was full restored after washing away the inhibitor. Results are means  $\pm$  S.E.M. of duplicate determinations. Similar results were obtained in another independent experiment.

<sup>1</sup> To whom correspondence should be addressed (email p.cohen@dundee.ac.uk).

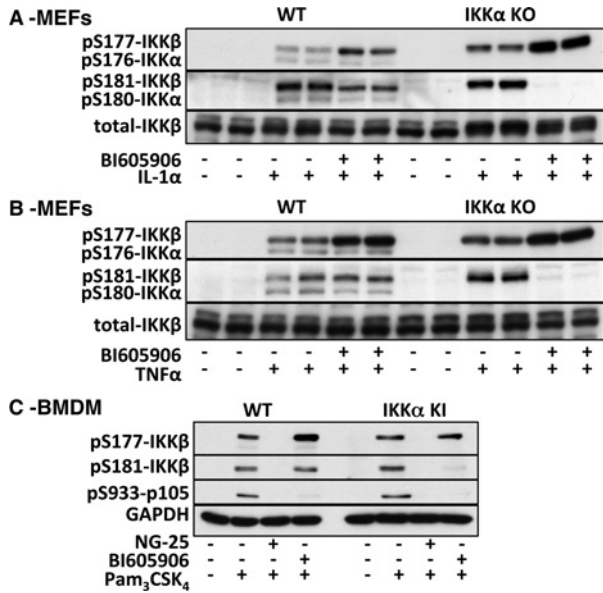

**Figure S4 Effect of inhibitors on agonist-stimulated phosphorylation of IKK $\beta$  at Ser<sup>177</sup> and Ser<sup>181</sup> in MEFs and BMDM**

(**A** and **B**) MEFs from wild-type (WT) or IKK $\alpha$ -knockout (KO) mice were incubated for 1 h without (–) or with (+) 5.0  $\mu$ M BI 605906 and then stimulated for 10 min with 5.0 ng/ml IL-1 (**A**) or 10 ng/ml TNF (**B**). Following cell lysis, cell extract (20  $\mu$ g of protein) was denatured in SDS, subjected to SDS/PAGE, and immunoblotted with antibodies that recognize IKK $\alpha$  and IKK $\beta$  phosphorylated at Ser<sup>176</sup> and Ser<sup>177</sup> respectively, or with antibodies that recognize IKK $\alpha$  and IKK $\beta$  phosphorylated at Ser<sup>180</sup> or Ser<sup>181</sup> respectively. The membranes were also immunoblotted with antibodies that recognize all forms of IKK $\beta$ . (**C**) Same as (**A** and **B**), except that BMDMs from wild-type (WT) mice and knockin (KI) mice expressing the catalytically inactive mutant of IKK $\alpha$  were used and the cells were stimulated for 10 min with 1.0  $\mu$ g/ml Pam<sub>3</sub>CSK<sub>4</sub>. An antibody recognizing GAPDH (glyceraldehyde-3-phosphate dehydrogenase) was used as a loading control.

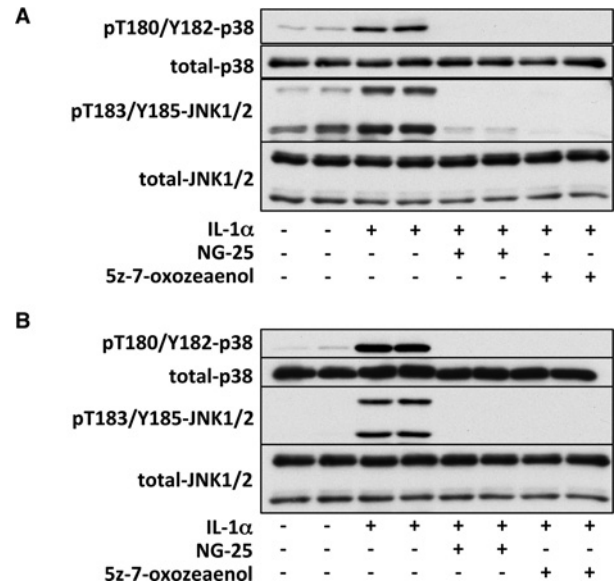

**Figure S6 TAK1 inhibitors suppress the IL-1-stimulated phosphorylation of MAPKs in MEFs from HOIP[C879S]- and NEMO[D311N]-knockin mice**

(**A**) As in Figure S5, except that before stimulation with IL-1, MEFs from mice expressing the HOIP[C879S] mutant were incubated for 1 h without (–) or with (+) the TAK1 inhibitors NG25 (1.0  $\mu$ M) or 5Z-7-oxozeaenol (1.0  $\mu$ M) before stimulation with 5.0 ng/ml IL-1 for the times indicated. (**B**) Same as (**A**), except that the experiment was performed with MEFs from mice expressing the polyubiquitin-binding-deficient mutant NEMO[D311N].

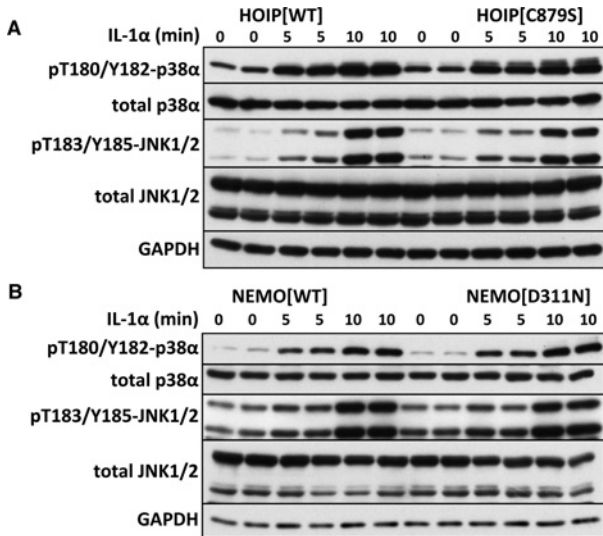

**Figure S5 Phosphorylation of MAPKs is unimpaired in MEFs from HOIP[C879S] and NEMO[D311N] mice**

(**A**) MEFs from wild-type mice (HOIP[WT]) or knockin mice expressing the inactive HOIP[C879S] mutant were stimulated with 5.0 ng/ml IL-1 for the times indicated. After cell lysis, 20  $\mu$ g of cell extract protein was denatured in SDS, subjected to SDS/PAGE and immunoblotted with the antibodies indicated. (**B**) Same as (**A**), but using MEFs from mice expressing the polyubiquitin-binding-deficient mutant of NEMO (NEMO[D311N]). The antibody recognizing pT183/Y185 of JNK1/2 was from Invitrogen and the antibody recognizing pT180/Y182 of p38 $\alpha$  MAPK was from Cell Signaling Technology.

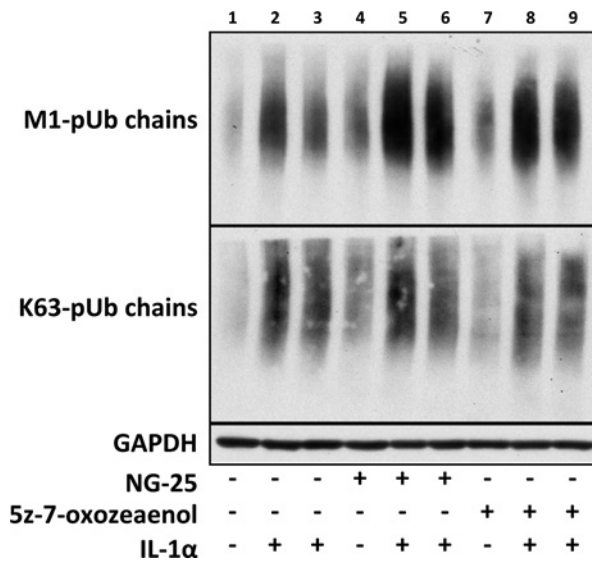

**Figure S7** Effect of TAK1 inhibition on the IL-1-stimulated formation of Lys<sup>63</sup>-linked and Met<sup>1</sup>-linked ubiquitin chains

MEFs were incubated for 1 h with (+) or without (-) 2  $\mu$ M NG25 or 1  $\mu$ M 5Z-7-oxozeaenol, then stimulated for 10 min with 5 ng/ml IL-1 $\alpha$  and lysed. The Met<sup>1</sup>-linked and Lys<sup>63</sup>-linked ubiquitin chains present in 2 mg of cell extract protein were captured on Halo-NEMO [1], released by denaturation in SDS and immunoblotted with antibodies that recognize Met<sup>1</sup>-linked or Lys<sup>63</sup>-linked ubiquitin chains specifically. The same cell extracts (20  $\mu$ g of protein) were immunoblotted with an anti-GAPDH antibody as a loading control.

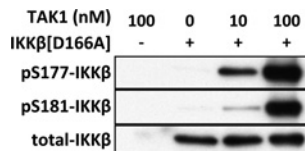

**Figure S8** TAK1 phosphorylates IKK $\beta$  at Ser<sup>177</sup> and Ser<sup>181</sup> *in vitro*

Catalytically inactive IKK $\beta$ [D166A] (0.8  $\mu$ M) was incubated for 3 min at 30 °C with the indicated concentrations of the active TAK1-TAB1 fusion protein in 50 mM Tris/HCl (pH 7.5), 0.1 mM EGTA, 2 mM DTT, 10 mM magnesium acetate and 0.1 mM ATP. Reactions were terminated by denaturation in SDS and, after SDS/PAGE and transfer on to PVDF membranes, proteins were immunoblotted with antibodies that recognize IKK $\beta$  phosphorylated at Ser<sup>177</sup> or Ser<sup>181</sup> or antibodies recognizing all forms of IKK $\beta$ .

## REFERENCES

- Emmerich, C. H., Ordureau, A., Strickson, S., Arthur, J. S., Pedrioli, P. G., Komander, D. and Cohen, P. (2013) Activation of the canonical IKK complex by K63/M1-linked hybrid ubiquitin chains. *Proc. Natl. Acad. Sci. U.S.A.* **110**, 15247–15252 [CrossRef](#) [PubMed](#)

Received 4 April 2014/20 May 2014; accepted 9 June 2014

Published as BJ Immediate Publication 9 June 2014, doi:10.1042/BJ20140444
